# Supplementary material
Source: publisher figshare collection journal article supplement (https://sage.figshare.com/ndownloader/files/23255264)
Supplement: Supplementary file 1 [file 23255264]

## Appendix

A primary care randomised control trial of Hall and conventional restorative techniques.

Boyd DH, Thomson WM, Leon de la Barra S, Fuge K, van den Heever R, Butler B, Leov F, Foster Page LA.

### Contents:

Figure 1. CONSORT Flow Diagram of children in study

Figure 2. CONSORT Flow Diagram of teeth in study

Table 1. Attrition analysis at 24 months

Figure 1. CONSORT flow diagram of children in study

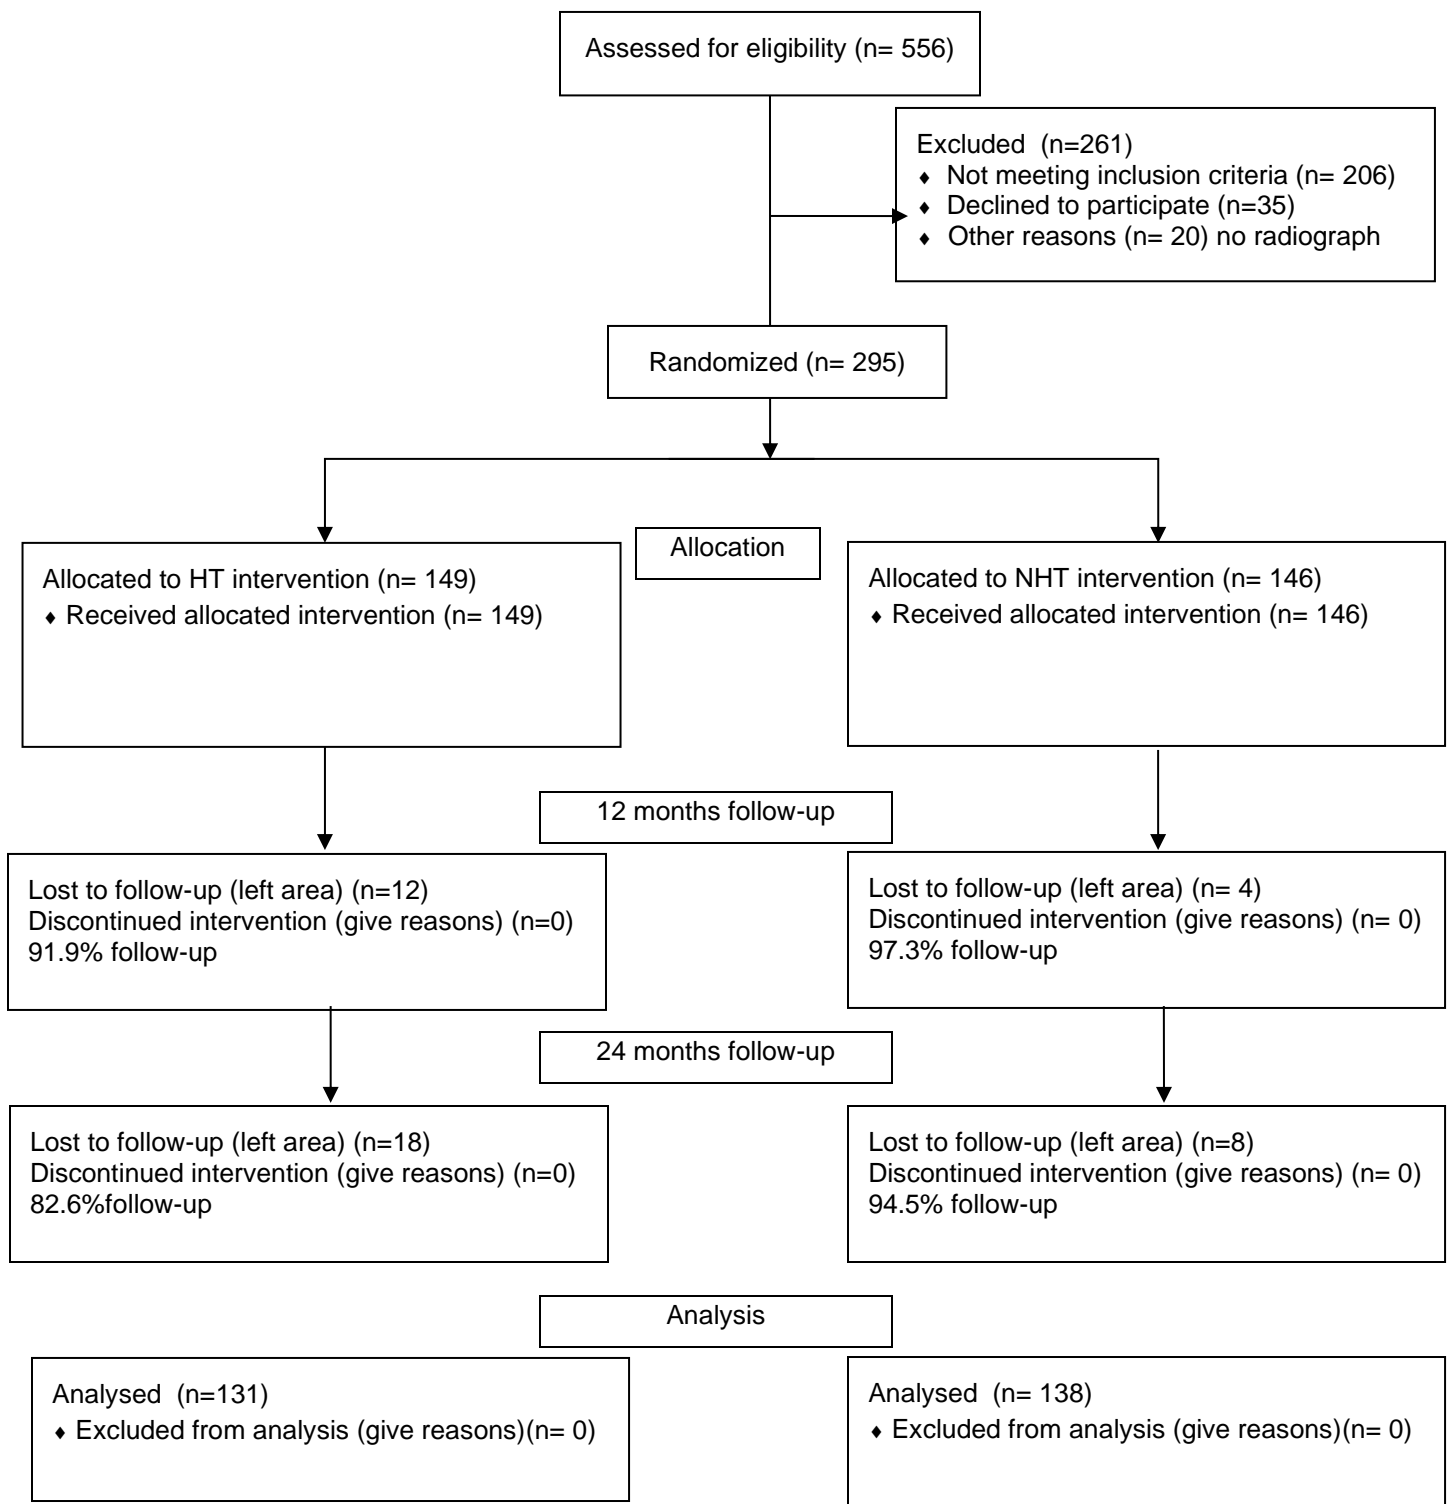

Figure 2. CONSORT flow diagram of teeth in study

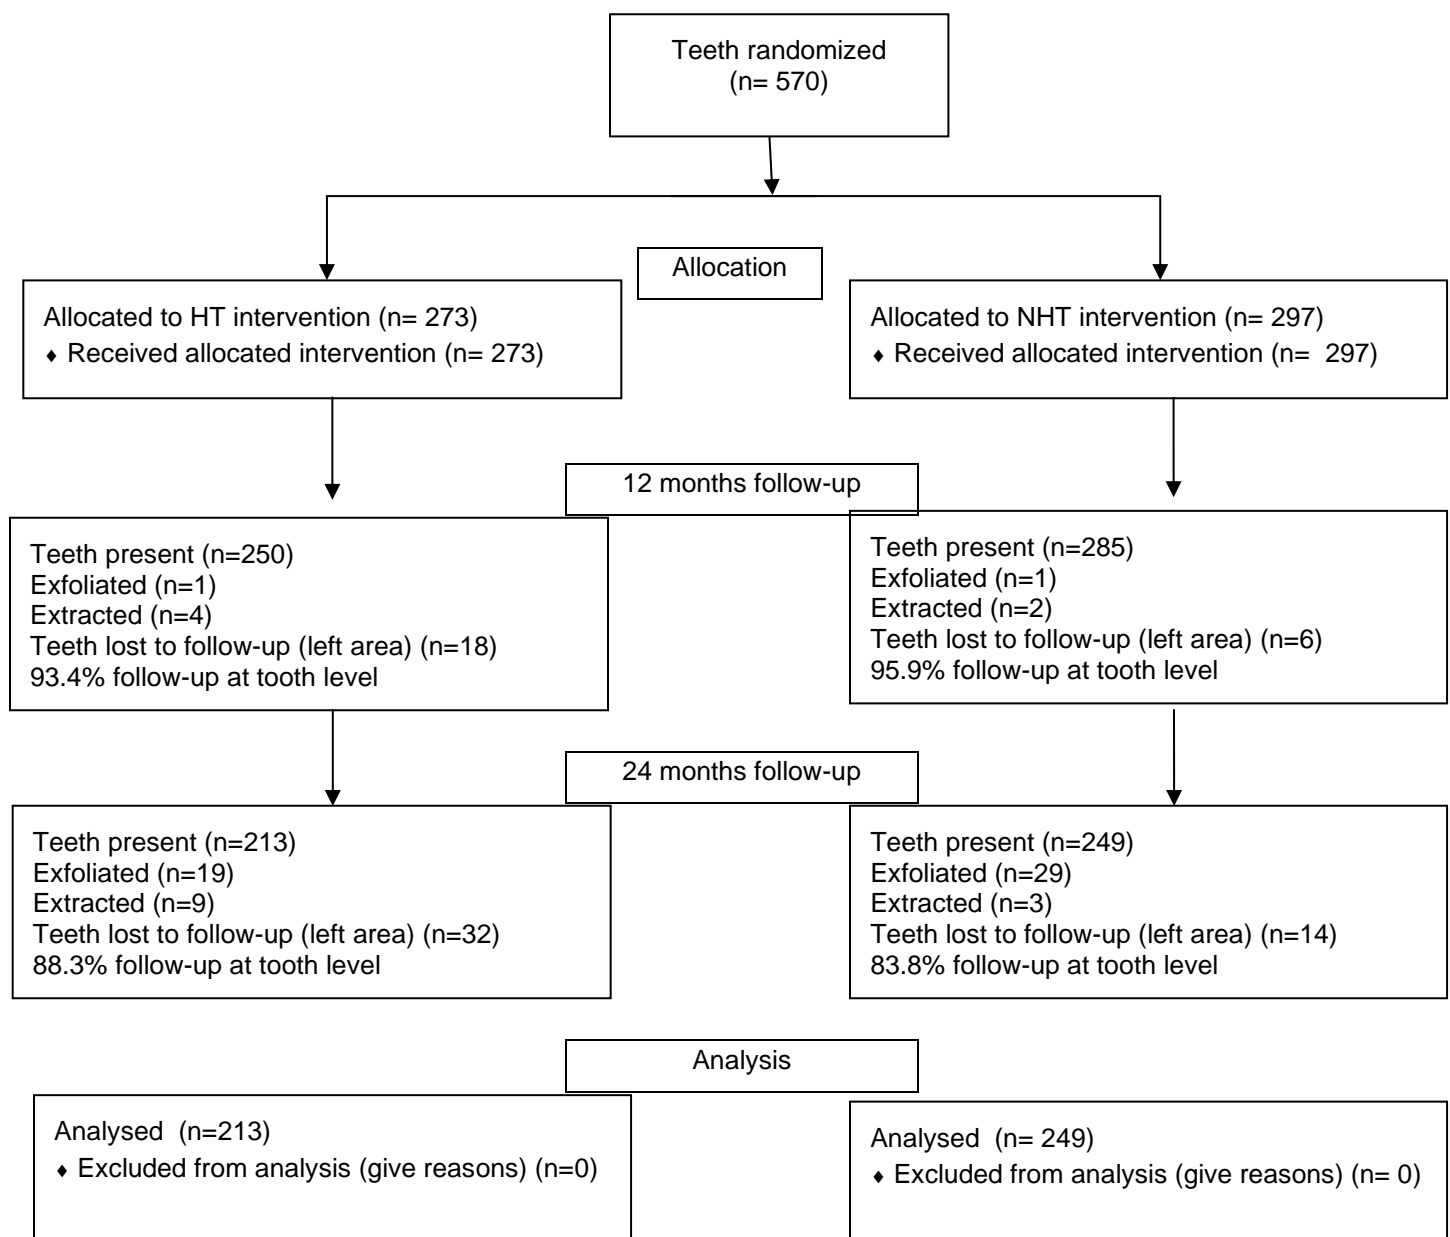

Appendix Table 1a. Attrition analysis at 24 months

|               | Baseline<br>N (%) | Followed-up<br>N (%) | Not followed-up<br>N (%) |
|---------------|-------------------|----------------------|--------------------------|
| Total         | 295 (100)         | 269 (91.2)           | 26 (8.8)                 |
| Sex           |                   |                      |                          |
| Male          | 157 (53.2)        | 144 (53.5)           | 13 (50.0)                |
| Female        | 138 (46.8)        | 125 (46.5)           | 13 (50.0)                |
| Age           |                   |                      |                          |
| Preschool     | 38 (12.9)         | 35 (13.0)            | 3 (11.5)                 |
| 5 years       | 92 (31.2)         | 84 (31.2)            | 8 (30.8)                 |
| 6 years       | 86 (29.2)         | 79 (29.4)            | 7 (26.9)                 |
| 7-8 years     | 79 (26.8)         | 71 (26.4)            | 8 (30.8)                 |
| Ethnicity     |                   |                      |                          |
| Māori         | 116 (39.3)        | 101 (37.5)           | 15 (57.7) <sup>a</sup>   |
| Non-Māori     | 179 (60.7)        | 168 (62.5)           | 11 (42.3)                |
| NZDep13       |                   |                      |                          |
| High          | 124 (42.0)        | 110 (40.8)           | 14 (53.8)                |
| Medium        | 116 (39.3)        | 106 (39.4)           | 10 (38.5)                |
| Low           | 52 (17.6)         | 50 (18.6)            | 2 (7.7)                  |
| Not specified | 3 (1.0)           | 3 (1.1)              | 0 (0.0)                  |
| Group         |                   |                      |                          |
| Hall          | 149 (50.5)        | 131 (48.7)           | 18 (69.2) <sup>a</sup>   |
| Non-Hall      | 146 (49.5)        | 138 (51.3)           | 8 (30.8)                 |

<sup>a</sup>p<0.05
